# Supplementary material
Source: MDPI journal article supplement (https://www.mdpi.com/2079-6412/13/3/657)
Supplement: s1 [file s1]

# Tailored Biobased Resins from Acrylated Vegetable Oils for Application in Wood Coatings

Sabine Briede <sup>1,\*</sup>, Oskars Platnieks <sup>1,\*</sup>, Anda Barkane <sup>1</sup>, Igors Sivacovs <sup>2</sup>, Armands Leitans <sup>3</sup>, Janis Lungevics <sup>3</sup> and Sergejs Gaidukovs <sup>1,\*</sup>

<sup>1</sup> Institute of Polymer Materials, Faculty of Materials Science and Applied Chemistry, Riga Technical University, P. Valdena 3/7, LV-1048 Riga, Latvia; sabine.briede@rtu.lv (S.B.); anda.barkane@rtu.lv (A.B.)

<sup>2</sup> JSC Olaine Chemical Plant BIOLAR, Rupnicu 3, LV-2114 Olaine, Latvia; igors.sivacovs@biolar.lv

<sup>3</sup> Department of Mechanical Engineering and Mechatronics, Faculty of Mechanical Engineering, Transport and Aeronautics, Riga Technical University, Kipsalas 6B, LV-1048 Riga, Latvia; armands.leitans@rtu.lv (A.L.); janis.lungevics@rtu.lv (J.L.)

\* Correspondence: oskars.platnieks\_1@rtu.lv (O.P.); sergejs.gaidukovs@rtu.lv (S.G.)

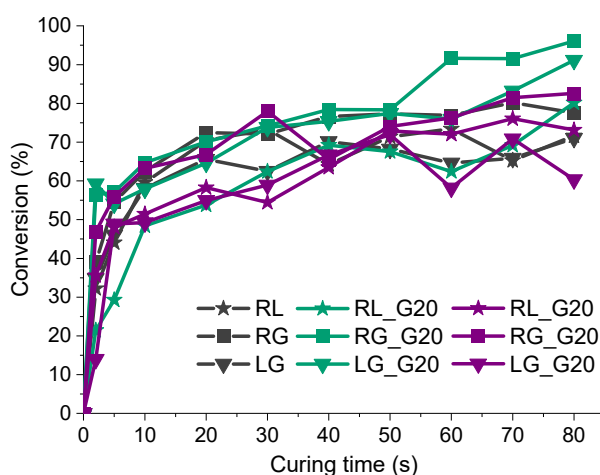

Figure S1. Conversion of acrylic double bonds in coating samples.

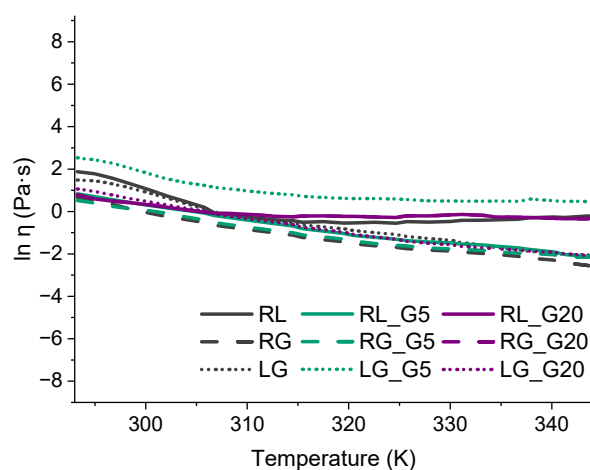

Figure S2. Viscosity and temperature relation for coating samples.

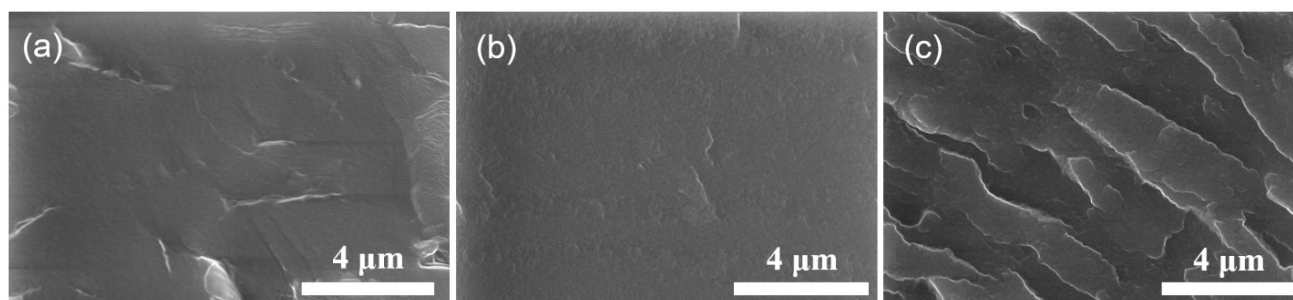

**Figure S3.** Cross-section SEM micrographs of the fracture surface morphology of (a) RL, (b) RL\_G5 and (c) RL\_G20 in 10,000× magnification.

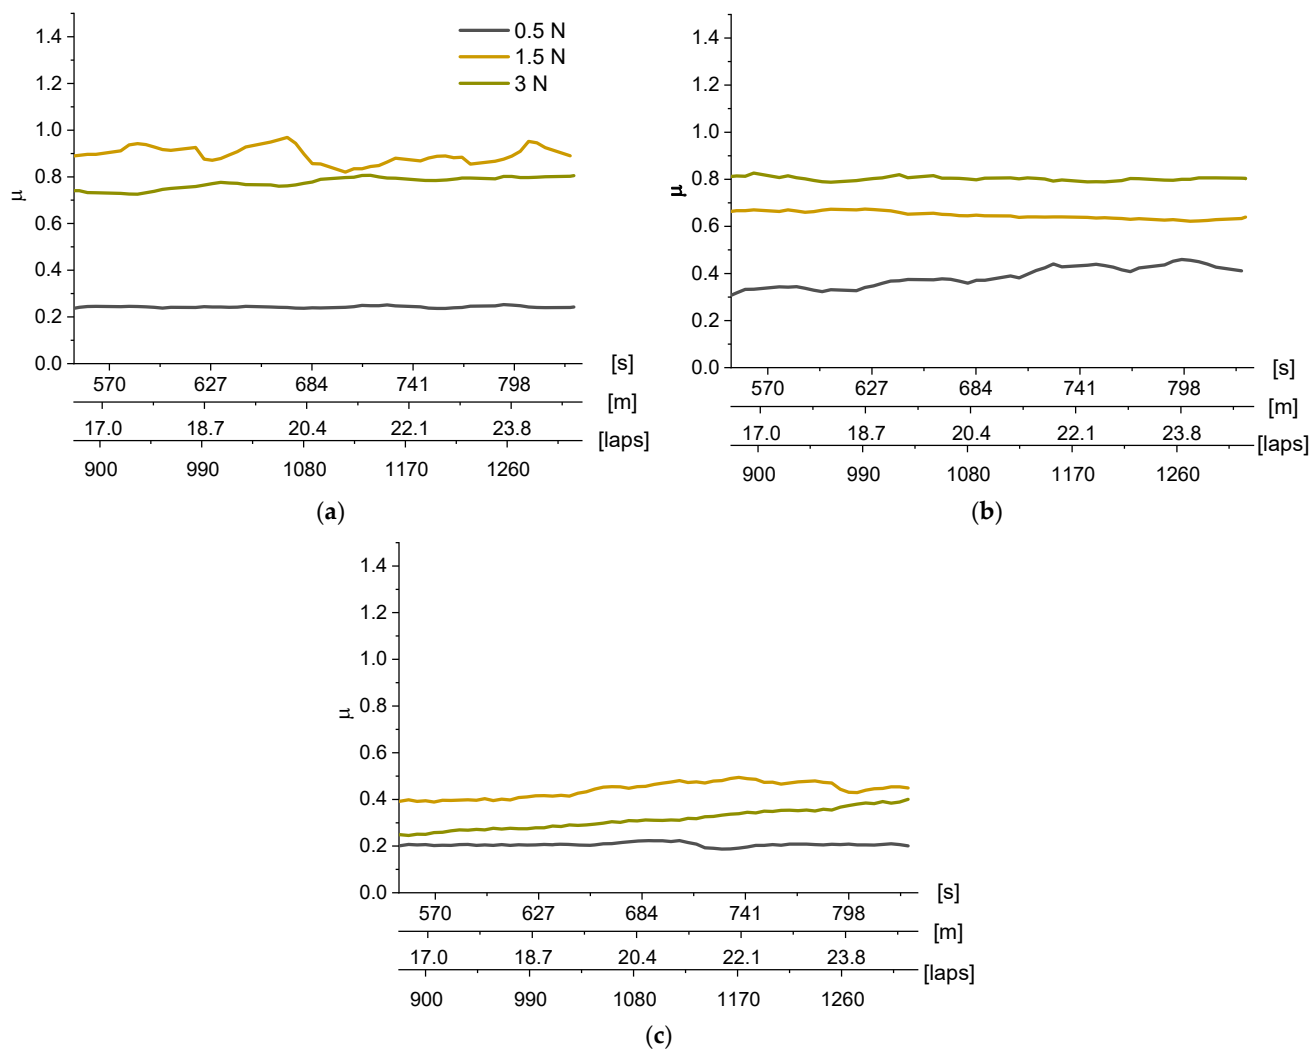

**Figure S4.** Photo-oxidized (9 h) coating friction coefficient dependence on applied indenter load, time, distance, and number of laps for (a) RL, (b) RL\_G5, (c) RL\_G20.
